# Supplementary material
Source: Springer Nature journal article supplement (https://www.springermedizin.de/resource/supplementary/12992_2011_126_MOESM2_ESM.pdf/9616510)

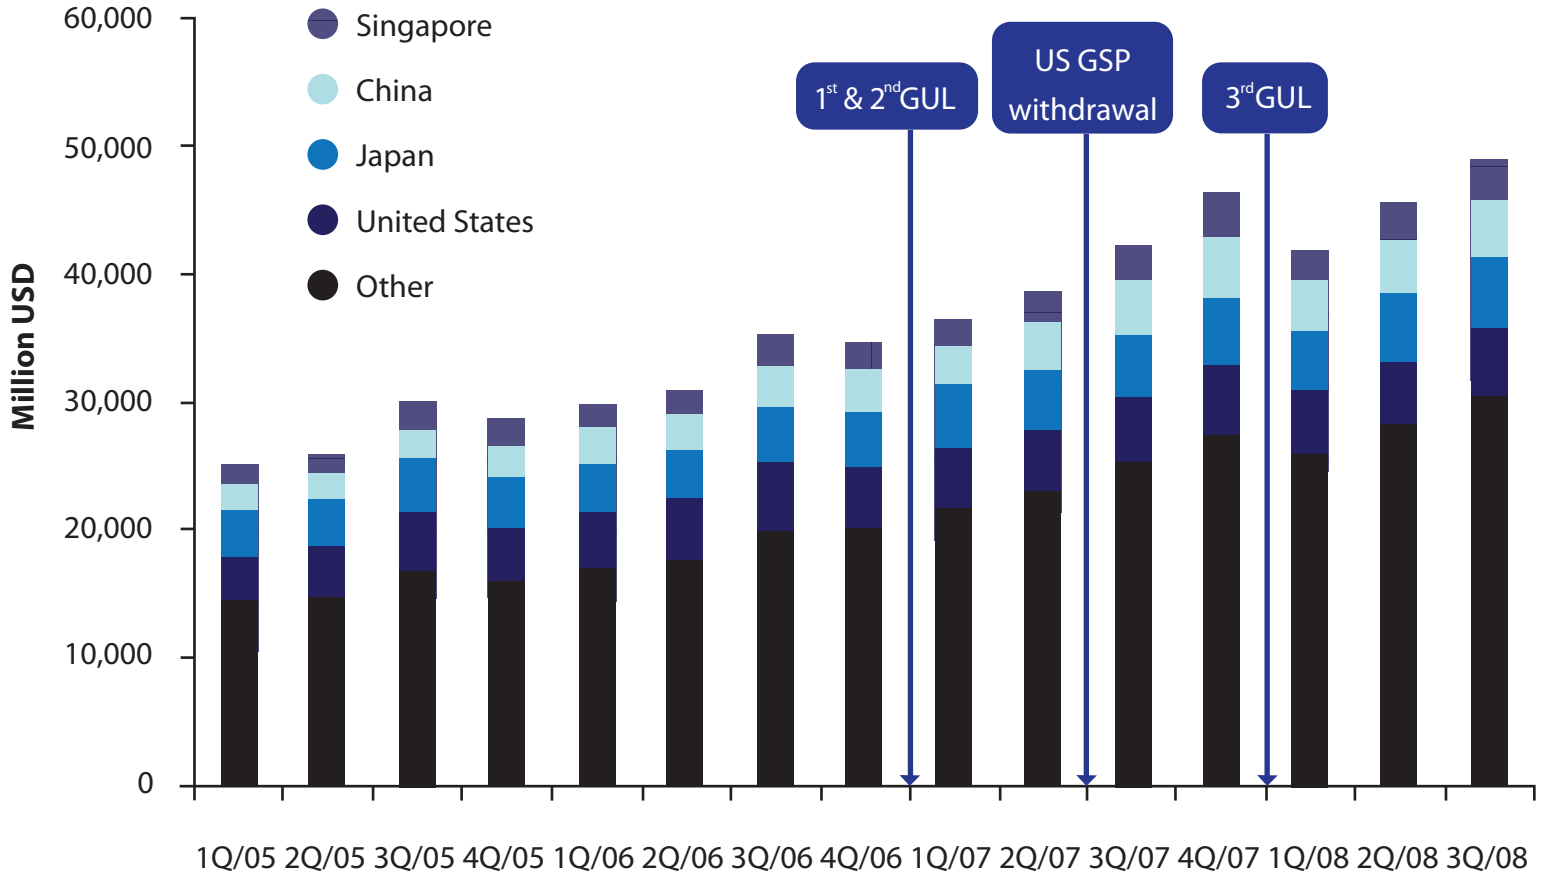

**GUL : Government Use License**

**Trimester/Year**

**Source: Department of Export Promotion**

Supplement: MOESM2 [file 9616510]
